# Supplementary material for: Characterisation of colistin resistance in Gram-negative microbiota of pregnant women and neonates in Nigeria
Source: PubMed Central journal article supplement (PMC10940312; doi:10.1038/s41467-024-45673-6), 2024-03-14
Supplement: 41467_2024_45673_MOESM1_ESM.pdf [file 41467_2024_45673_MOESM1_ESM.pdf]

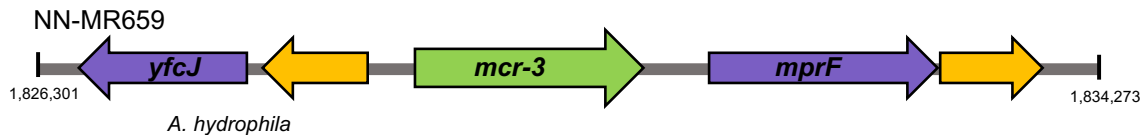

**Supplementary Figure 1:** Highlights the *mcr-3* *Aeromonas hydrophila* NN-MR659 isolate which is flanked by genes *yfcJ* upstream and *mprF* downstream.

### Supplementary Discussion

#### *mcr-3* like genetic context

One *A. hydrophila* isolate cultured from an MR swab was positive for a chromosomal *mcr-3*-like gene (NN-MR659, genbank accession: CP124746). From 264 available *A. hydrophila* genomes in NCBI, only n=4 contained *mcr-3* genes (CP028567.2, AP022206.1, VHIW01000011, AP025277, JARESK010000048). Further analysis showed a single amino acid difference (I166L), with a total of 25 SNPs between the *mcr-3* like gene detected in this study to an *A. hydrophila* isolate (Genbank accession number CP027804). The *mcr-3* like gene (1,626 bp) showed a 94.1-94.8 % amino acid identity to proteins found in three *Aeromonas* species: one *A. hydrophila* isolate from human peritoneal fluid (NZ\_AOBN01000008.1), one *Aeromonas caviae* isolate from lake water in Malaysia (NZ\_JWJP01000016.1) and one *Aeromonas media* isolate of unknown origin (NZ\_CDBZ01000089.1), suggesting it might be a common gene in *Aeromonas* species. The *mcr-3* gene for the three *Aeromonas* isolates was between an *eamA* and a diacylglycerol. There were no integrases or insertion sequences around the *mcr-3*.

#### Aeromonas and *mcr* discussion

Interestingly, we detected an *mcr* positive *A. hydrophila* isolate through our *mcr* PCR screening method and *Aeromonas* have been linked as the origin species for *mcr-3*<sup>1</sup>. Further sequencing has cast doubt on whether this is a true *mcr* gene, or whether this is an associated phosphoethanolamine gene. There are now several reports on colistin resistant *Aeromonas* species in the environmental context, particularly the aquatic environment, however Komeda *et al.*, 2022 recently published data where they identified clinical *Aeromonas* harbouring *mcr* like genes, or genes encoding phosphoethanolamine transferases<sup>2</sup>. Whilst *mcr-3* might not be the primary cause for colistin resistance in *Aeromonas*, as the insertion of IS elements may have interrupted gene expression as discussed by Xu *et al*<sup>3</sup>, the presence of *mcr-3* genes in *Aeromonas* isolates from both a clinical origin presents a potential reservoir of colistin resistance warranting ongoing surveillance<sup>4</sup>.

a)

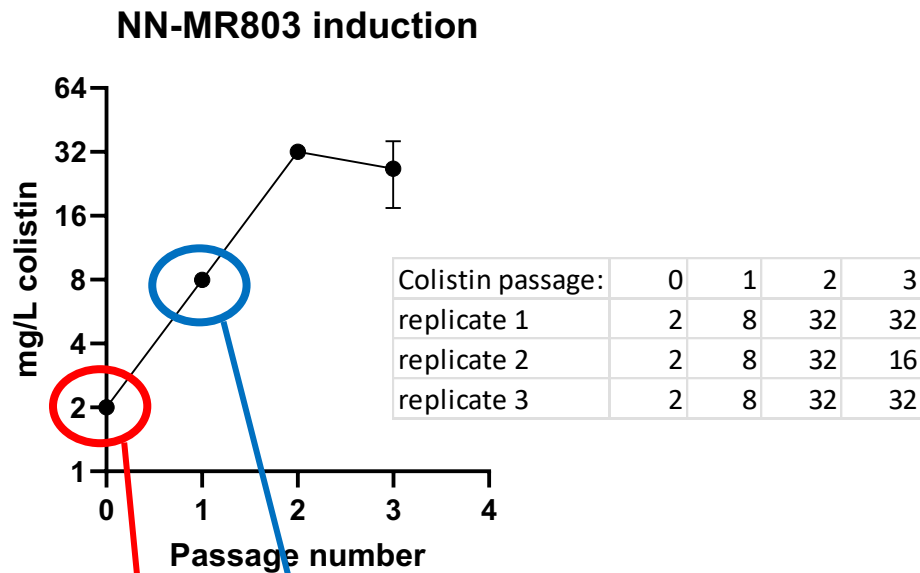

b)

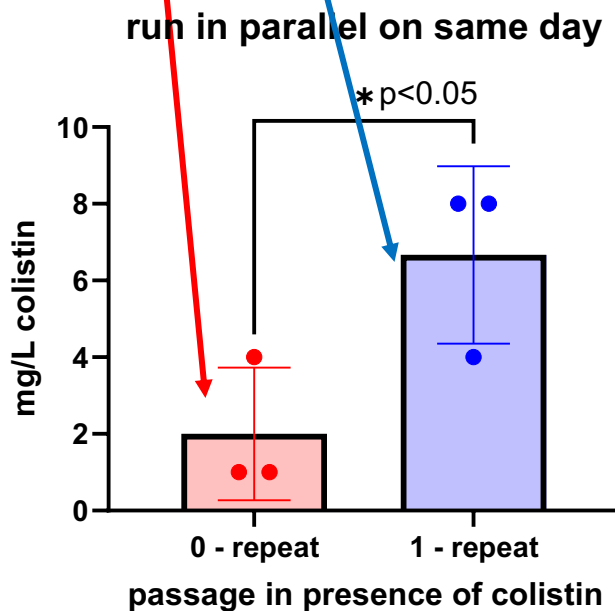

**Supplementary Figure 2: Showing colistin resistance induction for *mcr-9* positive isolate NN-MR803.**

Baseline MIC for colistin was higher (2 mg/L) in broth microdilution than in previous agar dilution screening (0.5 mg/L).

(a) Serial sub-culture and repeat MIC from last growth well showed 4-fold increase after one passage and a further 4-fold increase after two passages in sub-MIC colistin (0.5 mg/L). MICs performed at 24 hour intervals, using growth at 0.5 mg/L well as source of bacteria for each subsequent day. All MICs replicated in triplicate.

b) Colistin MIC for parent NN-MR803 isolate (sub-cultured in absence of colistin), run in parallel on same day as isolate that was sub-cultured with 0.5 mg/L colistin overnight prior to MIC. Student t-test comparison shows statistically significant increase in MIC ( $p < 0.05$ ) when MICs performed in parallel in triplicate.

**Supplementary table of primers and conditions**

| Target        | Sequence (5'-3')        | Conditions                                                                | Amplicon size (bp) | Reference                                 |
|---------------|-------------------------|---------------------------------------------------------------------------|--------------------|-------------------------------------------|
| <i>mcr-1</i>  | F- AGTCCGTTTGTCTTGTGGC  | 94°C— 5 minutes<br>{94°C 45 seconds                                       | 320                | (Rebelo <i>et al</i> , 2018) <sup>5</sup> |
|               | R- AGATCCTTGGTCTCGGCTTG | 30X — {59°C 30 seconds<br>{72°C 30 seconds<br>72°C— 10 minutes<br>4°C — ∞ |                    |                                           |
| <i>mcr-8</i>  | F-CGTACAGGTGTTGAGGTGCT  | 95°C— 5 minutes<br>{95°C 30 seconds                                       | 403                | This study                                |
|               | R-GCATCCCGGAATAACGTTGC  | 35X — {59°C 30 seconds<br>{72°C 30 seconds<br>72°C— 10 minutes<br>4°C — ∞ |                    |                                           |
| <i>mcr-9</i>  | F-TACCGGTATCCTTCCTGCCA  | 95°C— 5 minutes<br>{95°C 30 seconds                                       | 595                | This study                                |
|               | R-ACAACCGCCATCGTTCTCTT  | 35X— {59°C 30 seconds<br>{72°C 30 seconds<br>72°C— 10 minutes<br>4°C — ∞  |                    |                                           |
| <i>mcr-10</i> | F-CTCGCTTCGCTGATCCTGAT  | 95°C— 5 minutes<br>{95°C 30 seconds                                       | 689                | This study                                |
|               | R-CGCTGGTAATAGGTCCGGTCC | 35X— {59°C 30 seconds<br>{72°C 30 seconds<br>72°C— 10 minutes<br>4°C — ∞  |                    |                                           |

### Supplementary References

1. Yin, W. *et al.* Novel Plasmid-Mediated Colistin Resistance Gene *mcr-3* in *Escherichia coli*. *mBio* 8(3), e00543-1 (2017).
2. Komeda, T. *et al.* Emergence of a highly colistin-resistant *Aeromonas jandaei* clinical isolate harbouring four genes encoding phosphoethanolamine transferases in Nepal. *Int. J. Antimicrob. Agents* 59(4), 106544 (2022).
3. Xu, L. *et al.* The variants of polymyxin susceptibility in different species of genus *Aeromonas*. *Front. Microbiol.* 13, 1030564 (2022).
4. Shen Y., *et al.* Prevalence and Genetic Analysis of *mcr-3*-Positive *Aeromonas* Species from Humans, Retail Meat, and Environmental Water Samples. *Antimicrob Agents Chemother.* 27;62(9), e00404-18 (2018).
5. Rebelo, A.R. *et al.* Multiplex PCR for detection of plasmid-mediated colistin resistance determinants, *mcr-1*, *mcr-2*, *mcr-3*, *mcr-4* and *mcr-5* for surveillance purposes. *Euro surveillance* 23, 17. (2018).
